# Supplementary material for: A novel colorimetric immunoassay for sensitive monitoring of ochratoxin A based on an enzyme-controlled citrate-iron(iii) chelating system
Source: Royal Society of Chemistry journal article supplement (doi:10.1039/d1nj02291a), 2021-01-01
Supplement: d1nj02291a1.pdf [file d1nj02291a1.pdf]

## **Electronic Supplementary Information**

### **A novel colorimetric immunoassay for sensitive monitoring of ochratoxin A based on an enzyme-controlled citrate-iron(III) chelating system**

**Wenqiang Lai<sup>1,\*</sup> · Jiaqing Guo<sup>2</sup> · Zuqin Qiao<sup>3</sup> · Xuwei Chen<sup>1</sup> · Shuhan Wang<sup>1</sup> · Luxi Wu<sup>1</sup> · Quanying Cai<sup>1</sup> · Shuai Ye<sup>2</sup> · Youxiu Lin<sup>1</sup> · Dianping Tang<sup>4</sup>**

<sup>1</sup> Key Laboratory of Modern Analytical Science and Separation Technology of Fujian Province, Key Laboratory of Pollution Monitoring and Control of Fujian Province, College of Chemistry, Chemical Engineering and Environment, Minnan Normal University, Zhangzhou 363000, People's Republic of China

<sup>2</sup> Key Laboratory of Optoelectronic Devices and Systems of Ministry of Education and Guangdong Province, College of Physics and Optoelectronic Engineering, Shenzhen University, Shenzhen 518060, People's Republic of China

<sup>3</sup> Guizhou Research Institute of Chemical Industry, Guiyang 550000, People's Republic of China

<sup>4</sup> Key Laboratory of Analysis and Detection for Food Safety (Ministry of Education & Fujian Province), Institute of Nanomedicine and Nanobiosensing, Department of Chemistry, Fuzhou University, Fuzhou 350108, People's Republic of China

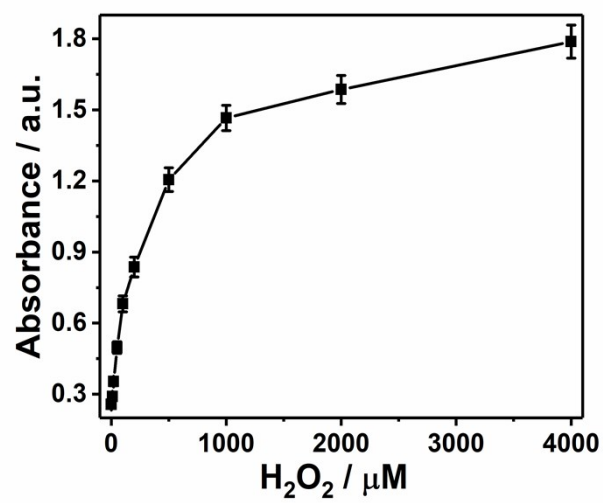

**Fig. S1** Absorbance intensity of the citrate-iron(III) chelating system toward H<sub>2</sub>O<sub>2</sub> standards with various concentrations [1.0 mM iron(III) used in this case].

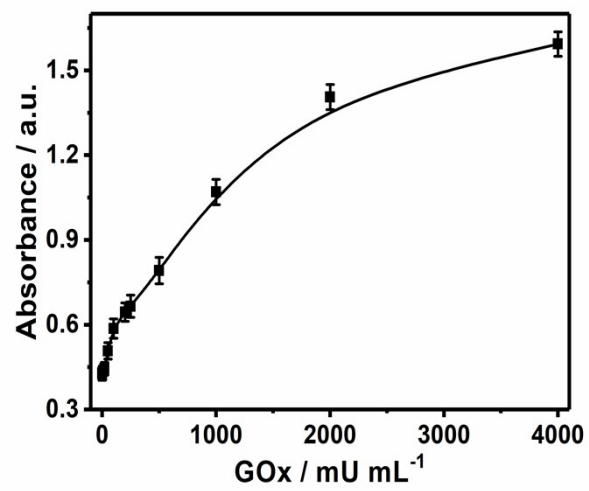

**Fig. S2** Catalytic reactivity of the GOx with different concentrations in the citrate-iron(III) chelating system.

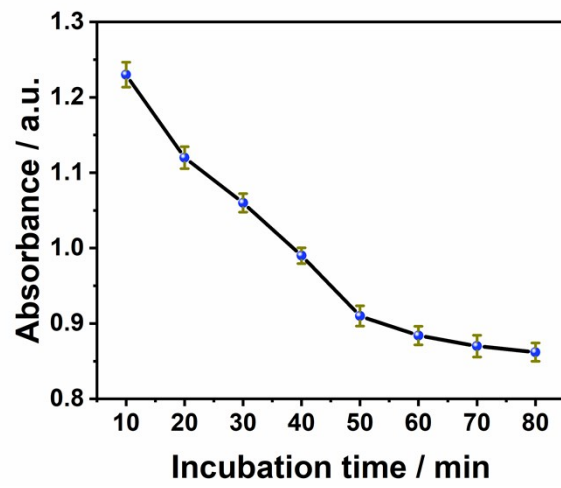

**Fig. S3** Effects of incubation time
